# Supplementary material for: Barcoded Pyrosequencing Reveals a Shift in the Bacterial Community in the Rhizosphere and Rhizoplane of Rehmannia glutinosa under Consecutive Monoculture
Source: MDPI journal article supplement (doi:10.3390/ijms19030850), 2018-03-14
Supplement: s1 [file s1]

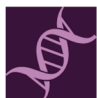

# Barcoded Pyrosequencing Reveals a Shift in the Bacterial Community in the Rhizosphere and Rhizoplane of *Rehmannia glutinosa* under Consecutive Monoculture

Linkun Wu <sup>1,2</sup>, Jun Chen <sup>1,3</sup>, Zhigang Xiao <sup>1,2</sup>, Xiaocheng Zhu <sup>4,5</sup>, Juanying Wang <sup>1,2</sup>, Hongmiao Wu <sup>1,2</sup>, Yanhong Wu <sup>1,2</sup>, Zhongyi Zhang <sup>3,5</sup> and Wenxiong Lin <sup>2,3,\*</sup>

<sup>1</sup> College of Life Sciences, Fujian Agriculture and Forestry University, Fuzhou 350002, China; wulinkun619@163.com (L.W.); chenjunfafu@163.com (J.C.); m18305987298@163.com (Z.X.); juanying020@163.com (J.W.); wuhongmiao2010@163.com (H.W.); wuyanhong\_2016@163.com (Y.W.)

<sup>2</sup> Fujian Provincial Key Laboratory of Agroecological Processing and Safety Monitoring, Fujian Agriculture and Forestry University, Fuzhou 350002, China

<sup>3</sup> Key Laboratory of Crop Ecology and Molecular Physiology (Fujian Agriculture and Forestry University), Fujian Province University, Fuzhou 350002, China; zyzhang@fafu.edu.cn

<sup>4</sup> Graham Centre for Agricultural Innovation (Charles Sturt University and NSW Department of Primary Industries), Charles Sturt University, Wagga NSW 2678, Australia; XZhu@csu.edu.au

<sup>5</sup> College of Crop Science, Fujian Agriculture and Forestry University, Fuzhou 350002, China

\* Correspondence: lwx@fafu.edu.cn; Tel.: +86-591-8376-9440

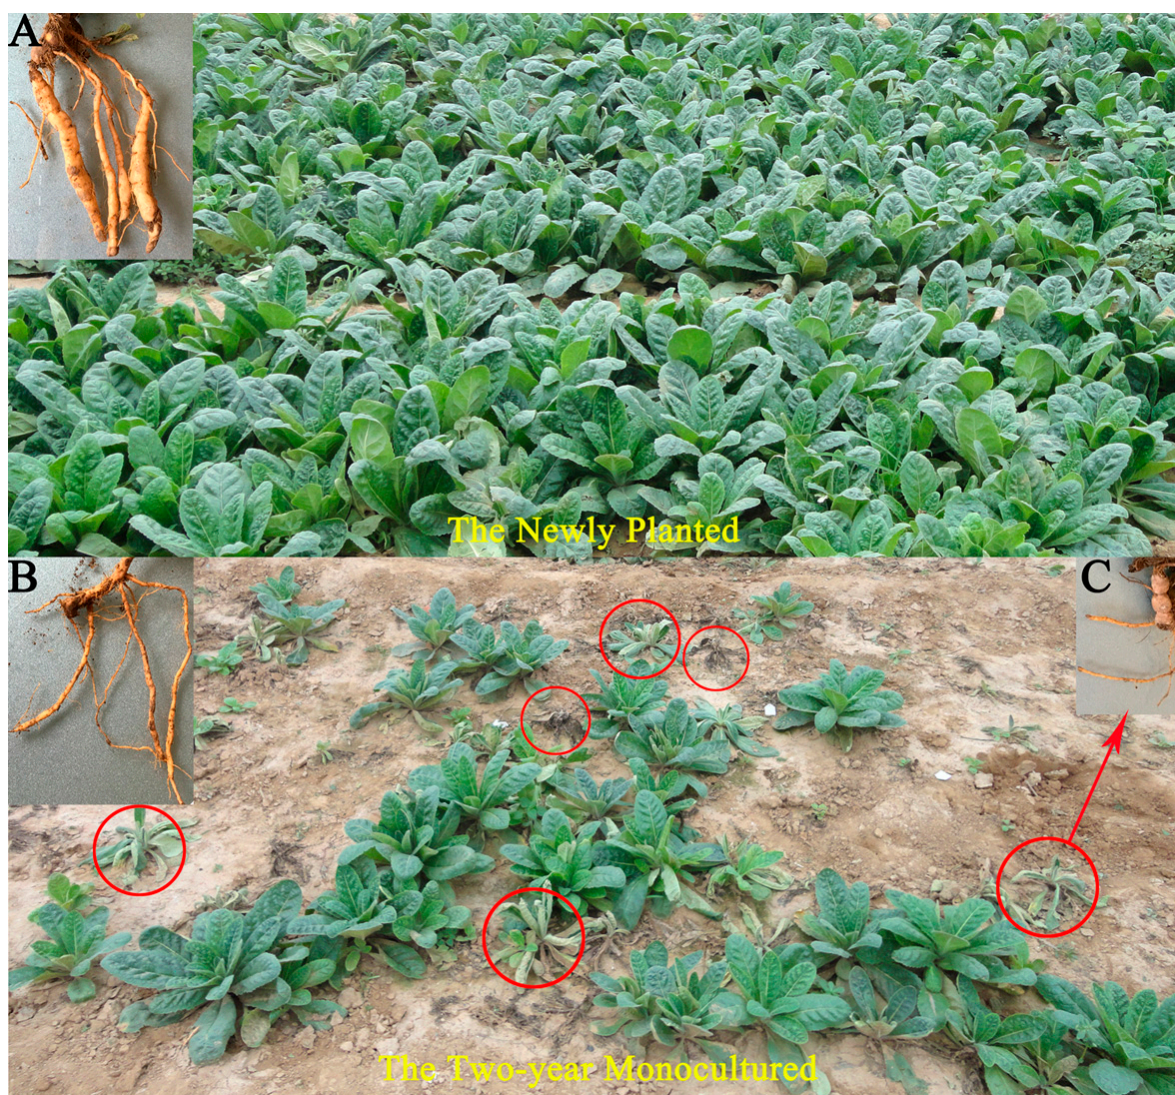

**Figure S1.** Photographs of above and below ground components of *Rehmannia glutinosa*. A, B and C represents the close-up views of the tuber roots of the newly planted plants (NP), the two-year monocultured uninfected plants (MU) and the two-year monocultured infected plants (MI). The two-year monocultured uninfected plants (MU) displayed large numbers of adventitious fibrous roots though without obvious symptoms of infection (B). The two-year monocultured infected plants (MI) displayed earlier wilt of the above ground plant parts (red circles), showing symptoms of infection in both leaf and tuberous roots (C).

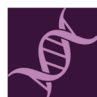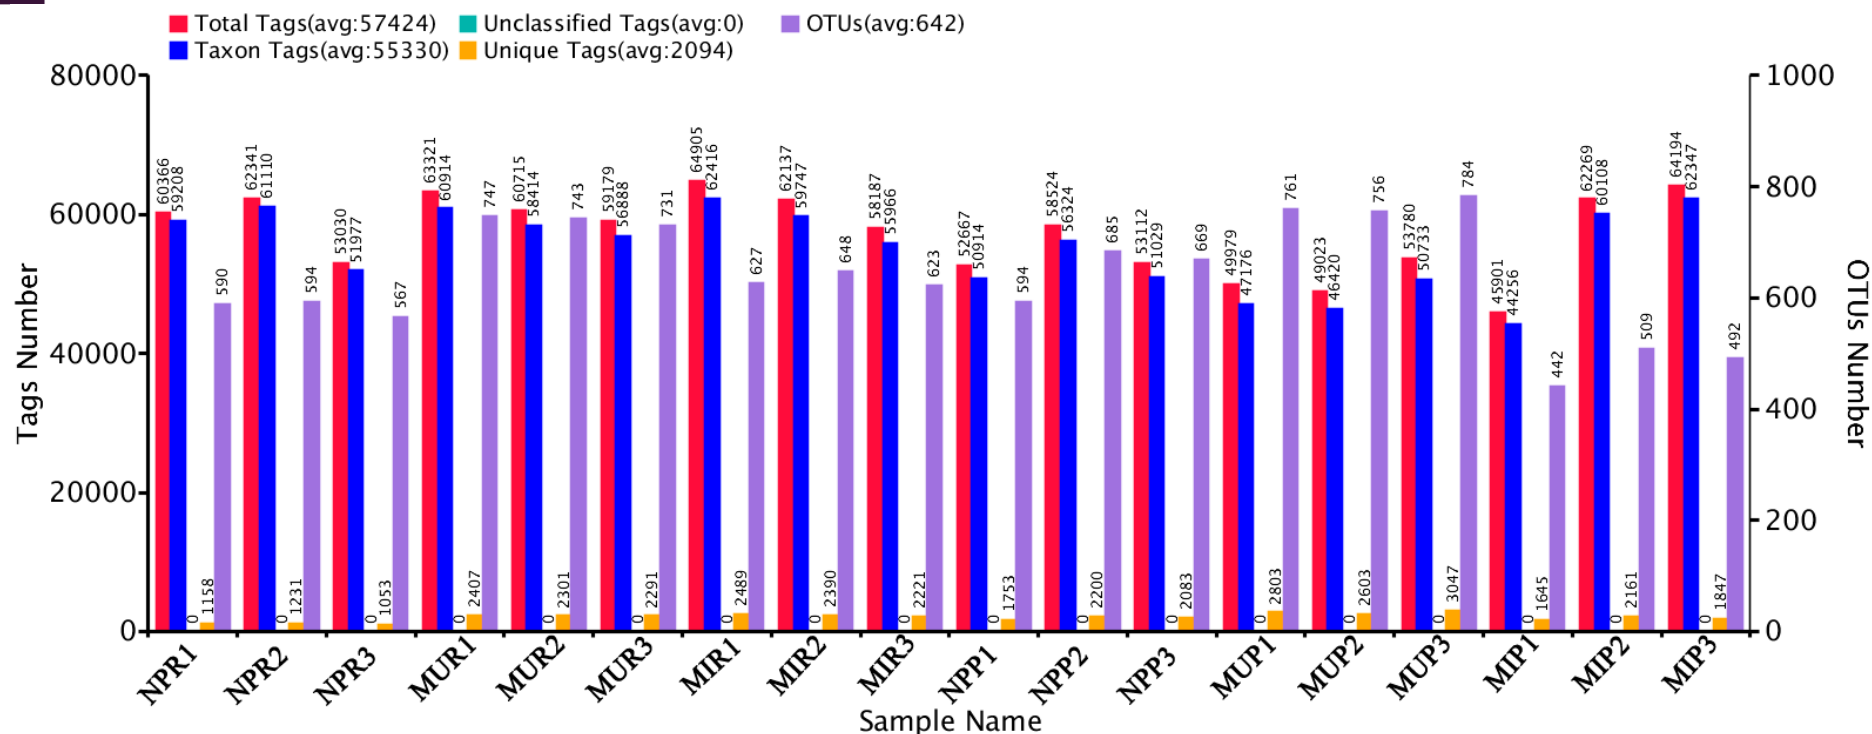

**Figure S2.** Statistics of OTU cluster and species annotation for individual samples. Total Tags (red columns): represent the total numbers of effective tags; Unique Tags (orange columns): represent the total numbers of singletons which were removed from the dataset before further analysis; Taxon Tags (blue columns): represent the total numbers of tags subjected to OTU cluster and with species annotation; Unclassified Tags (green columns): represent the total numbers of tags without species annotation; OTUs (purple columns): represent the OTUs numbers for each sample. NPR, MUR and MIR represent the rhizosphere soil from the newly planted, monocultured uninfected and infected plants, respectively. NPP, MUP and MIP represent the rhizoplane soil from the newly planted, monocultured uninfected and infected plants, respectively.

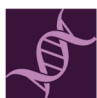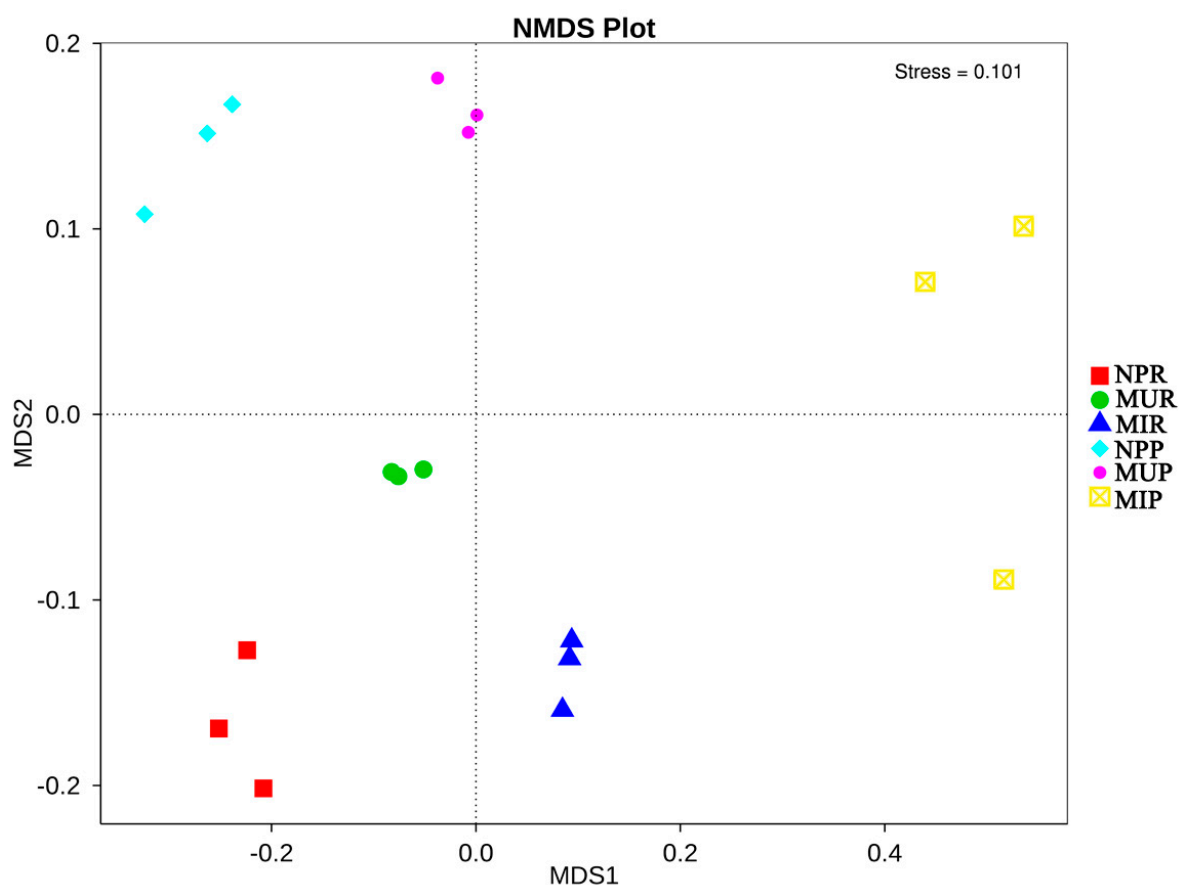

**Figure S3.** Non-metric multidimensional scaling (NMDS) ordinations analysis of bacterial communities among different soil categories. NPR, MUR and MIR represent the rhizosphere soil from the newly planted, monocultured uninfected and infected plants, respectively. NPP, MUP and MIP represent the rhizoplane soil from the newly planted, monocultured uninfected and infected plants, respectively.

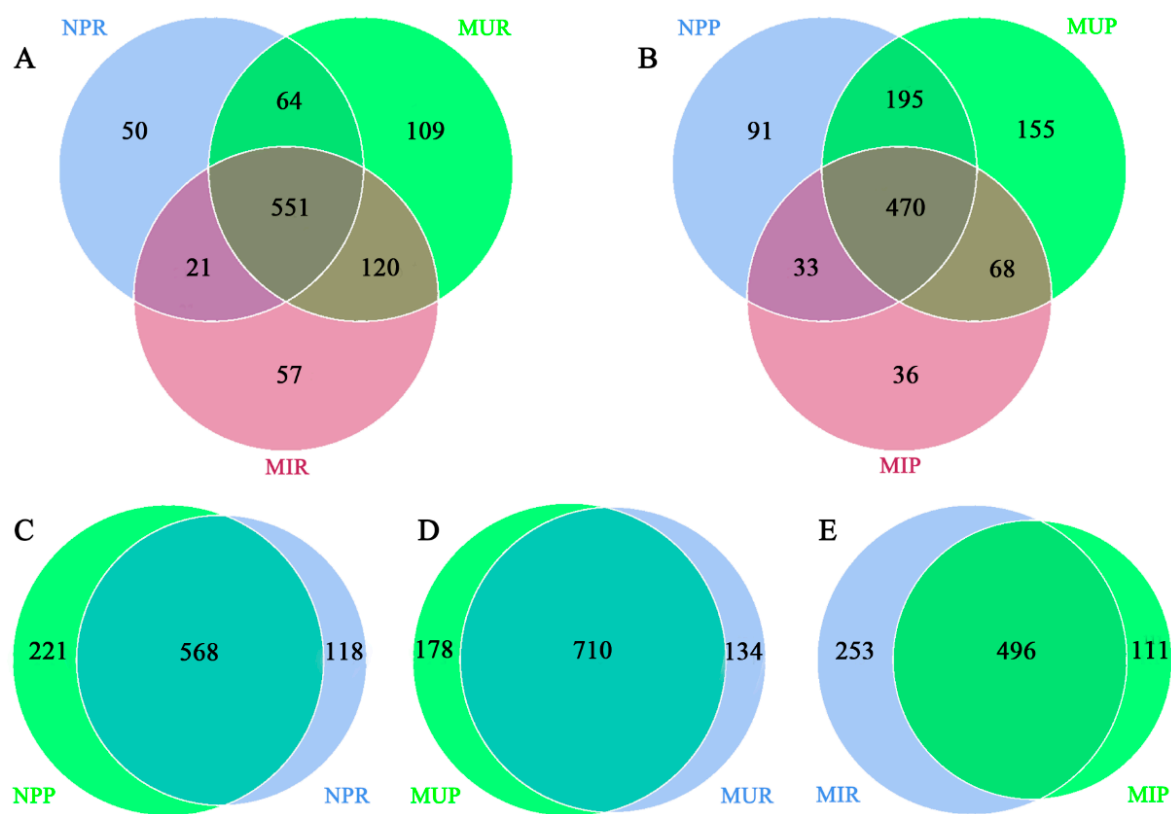

**Figure S4.** NPR, MUR and MIR represent the rhizosphere soil from the newly planted, monocultured uninfected and infected plants, respectively. NPP, MUP and MIP represent the rhizoplane soil from the newly planted, monocultured uninfected and infected plants, respectively.



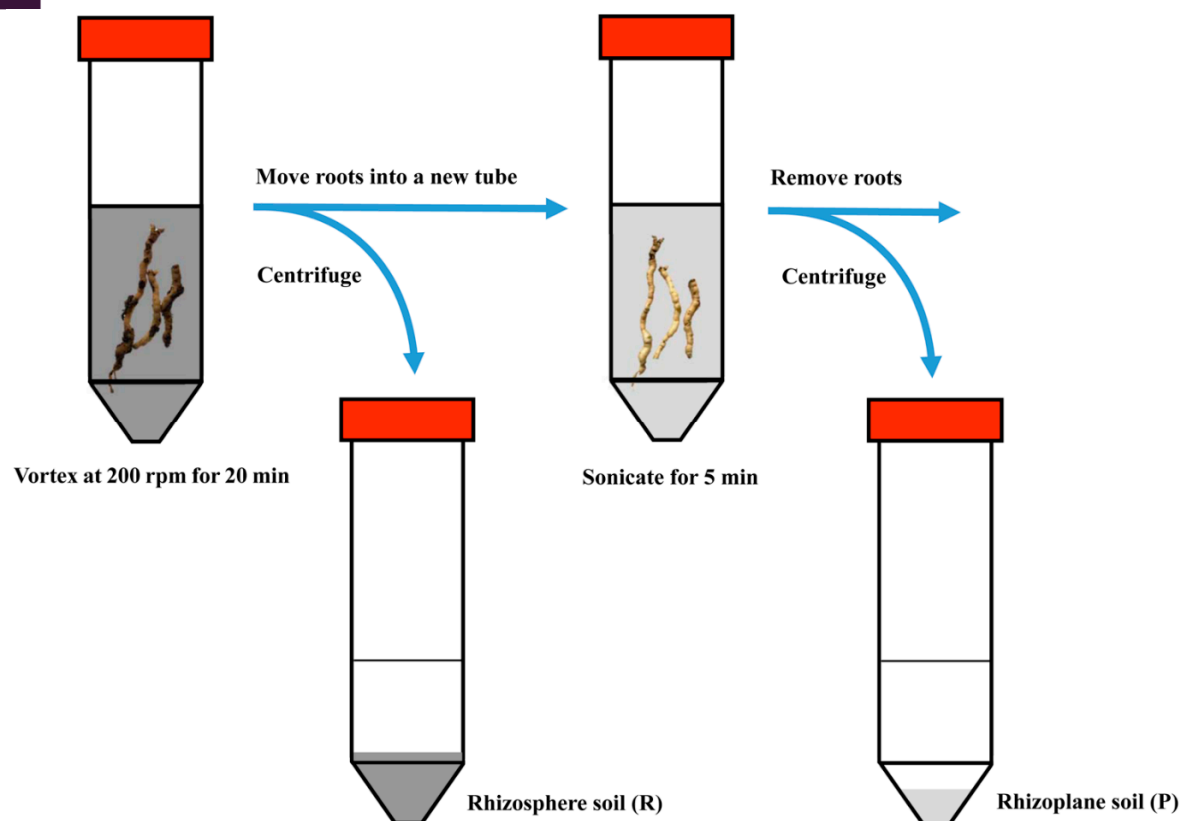

**Figure S5.** Scheme for the collection of rhizosphere and rhizoplane soils of *R. glutinosa*.

**Table S1.** The description of six soil categories.

| Site code              | Soil sample description                                                   |
|------------------------|---------------------------------------------------------------------------|
| <b>Rhizosphere (R)</b> |                                                                           |
| NPR                    | The rhizosphere soil from the newly planted (NP) group                    |
| MUR                    | The rhizosphere soil from the two-year monocultured uninfected (MU) group |
| MIR                    | The rhizosphere soil from the two-year monocultured infected (MI) group   |
| <b>Rhizoplane (P)</b>  |                                                                           |
| NPP                    | The rhizoplane soil from the newly planted (NP) group                     |
| MUP                    | The rhizoplane soil from the two-year monocultured uninfected (MU) group  |
| MIP                    | The rhizoplane soil from the two-year monocultured infected (MI) group    |

**Table S2.** The numbers of effective sequences that could be assigned to each taxonomic level in 18 soil samples.

| Sample name        | Kingdom | Phylum | Class  | Order  | Family | Genus  | Species |
|--------------------|---------|--------|--------|--------|--------|--------|---------|
| NPR1               | 59,208  | 59,202 | 59,170 | 59,116 | 58,905 | 49,322 | 14,934  |
| NPR2               | 61,110  | 61,107 | 61,042 | 60,986 | 60,740 | 50,552 | 15,311  |
| NPR3               | 51,977  | 51,971 | 51,940 | 51,875 | 51,669 | 43,185 | 12,711  |
| MUR1               | 60,914  | 60,876 | 60,808 | 60,653 | 59,735 | 55,973 | 11,207  |
| MUR2               | 58,414  | 58,378 | 58,341 | 58,207 | 57,338 | 53,860 | 10,708  |
| MUR3               | 56,888  | 56,848 | 56,797 | 56,654 | 55,732 | 52,218 | 10,267  |
| MIR1               | 62,416  | 62,411 | 62,369 | 62,328 | 61,849 | 59,438 | 12,914  |
| MIR2               | 59,747  | 59,742 | 59,714 | 59,658 | 59,154 | 56,792 | 12,392  |
| MIR3               | 55,966  | 55,958 | 55,909 | 55,852 | 55,394 | 53,198 | 11,698  |
| NPP1               | 50,914  | 50,913 | 50,878 | 50,800 | 50,455 | 45,006 | 12,444  |
| NPP2               | 56,324  | 56,317 | 56,298 | 56,193 | 55,773 | 49,928 | 14,162  |
| NPP3               | 51,029  | 51,026 | 50,976 | 50,873 | 50,507 | 44,864 | 12,778  |
| MUP1               | 47,176  | 47,153 | 47,134 | 46,999 | 45,898 | 41,950 | 8,584   |
| MUP2               | 46,420  | 46,403 | 46,384 | 46,224 | 45,064 | 41,277 | 8,218   |
| MUP3               | 50,733  | 50,708 | 50,675 | 50,506 | 49,306 | 44,929 | 9,352   |
| MIP1               | 44,256  | 44,256 | 44,226 | 12,866 | 12,582 | 11,475 | 2,409   |
| MIP2               | 60,108  | 60,104 | 60,082 | 19,473 | 19,030 | 17,430 | 3,608   |
| MIP3               | 62,347  | 62,344 | 62,324 | 16,653 | 16,279 | 14,497 | 3,017   |
| <b>*Percentage</b> | 100.00% | 99.98% | 99.91% | 87.95% | 86.89% | 78.91% | 18.75%  |

NPR, MUR and MIR represent the rhizosphere soil from the newly planted, monocultured uninfected and infected plants, respectively. NPP, MUP and MIP represent the rhizoplane soil from the newly planted, monocultured uninfected and infected plants, respectively. \* This represents the average percentage of effective sequences from 18 soil samples that could be assigned to each taxonomic level.

**Table S3.** Species richness and diversity indices in different soil categories.

| <b>Treatments</b>                         | <b>Observed species</b> | <b>Chao1</b> | <b>ACE</b> | <b>Shannon</b> |
|-------------------------------------------|-------------------------|--------------|------------|----------------|
| <b>The newly planted plants</b>           |                         |              |            |                |
| NPR                                       | 495.7b                  | 566.4a       | 593.7a     | 5.042b         |
| NPP                                       | 575.0a                  | 634.3a       | 652.6a     | 5.735a         |
| <b>The monocultured uninfected plants</b> |                         |              |            |                |
| MUR                                       | 654.7b                  | 718.5a       | 742.5a     | 5.675b         |
| MUP                                       | 696.3a                  | 755.9a       | 766.7a     | 5.975a         |
| <b>The monocultured infected plants</b>   |                         |              |            |                |
| MIR                                       | 555.3a                  | 628.3a       | 651.9a     | 5.493a         |
| MIP                                       | 431.7b                  | 615.6a       | 565.8a     | 2.496b         |

NPR, MUR and MIR represent the rhizosphere soil from the newly planted, monocultured uninfected and infected plants, respectively. NPP, MUP and MIP represent the rhizoplane soil from the newly planted, monocultured uninfected and infected plants, respectively. Different letters in columns show significant differences between rhizosphere and rhizoplane (NPR vs. NPP; MUR vs. MUP; MIR vs. MIP), determined by Tukey's test ( $p < 0.05$ ).
